# Supplementary material
Source: publisher figshare collection journal article supplement (https://acs.figshare.com/ndownloader/files/5882703)
Supplement: Supplementary file 1 [file 5882703]

# om020667p.cif

data_manuscript_title
'OM020667P.Reactivity of the amido complex [Re(NHpTol)(CO)3(bipy)] toward 
     neutral organic electrophiles'

_audit_creation_method            SHELXL

_pub_requested_journal 'Organometallics'


_audit_creation_method            SHELXL

_publ_contact_author
;
     JULIO PEREZ
     Departamento de Quimica Organica e Inorganica/IUQOEM-Facultad de Qu�mica
     Universidad de Oviedo
     C/ Julian Claveria s/n
     33006 Oviedo  (ASTURIAS)
     SPAIN
;

_publ_contact_author_phone          '+34-85-102985
_publ_contact_author_fax            '+34-85-103446
_publ_contact_author_email          'japm@sauron.quimica.uniovi.es'

;
loop_
    _publ_author_name
    _publ_author_address

     'Eva Hevia'
;
     Departamento de Quimica Organica e Inorganica/IUQOEM-Facultad de Qu�mica
     Universidad de Oviedo
     C/ Julian Claveria s/n
     33006 Oviedo  (ASTURIAS)
     SPAIN
;

     'Julio Perez'
;    
     Departamento de Quimica Organica e Inorganica/IUQOEM-Facultad de Qu�mica
     Universidad de Oviedo
     C/ Julian Claveria s/n
     33006 Oviedo  (ASTURIAS)
     SPAIN
;

    'Victor Riera'
;    
     Departamento de Quimica Organica e Inorganica/IUQOEM-Facultad de Qu�mica
     Universidad de Oviedo
     C/ Julian Claveria s/n
     33006 Oviedo  (ASTURIAS)
     SPAIN
;
     'Daniel Miguel'
;
     Departamento de Quimica Inorganica
     Facultad de Ciencias
     Universidad de Valladolid
     47071 Valladolid
     SPAIN

;

#-------------------------- data section of block ---------------------------
    
data_Compound_2_(ehf27a) 
  
_audit_creation_method            SHELXL-97 
_chemical_name_systematic 
; 
 ? 
; 
_chemical_name_common             ? 
_chemical_melting_point           ? 
_chemical_formula_moiety          ? 
_chemical_formula_sum 
 'C29 H25 Cl2 N4 O3 Re S' 
_chemical_formula_weight          766.69 
  
loop_ 
 _atom_type_symbol 
 _atom_type_description 
 _atom_type_scat_dispersion_real 
 _atom_type_scat_dispersion_imag 
 _atom_type_scat_source 
 'C'  'C'   0.0033   0.0016 
 'International Tables Vol C Tables 4.2.6.8 and 6.1.1.4' 
 'H'  'H'   0.0000   0.0000 
 'International Tables Vol C Tables 4.2.6.8 and 6.1.1.4' 
 'N'  'N'   0.0061   0.0033 
 'International Tables Vol C Tables 4.2.6.8 and 6.1.1.4' 
 'O'  'O'   0.0106   0.0060 
 'International Tables Vol C Tables 4.2.6.8 and 6.1.1.4' 
 'S'  'S'   0.1246   0.1234 
 'International Tables Vol C Tables 4.2.6.8 and 6.1.1.4' 
 'Re'  'Re'  -1.0185   7.2310 
 'International Tables Vol C Tables 4.2.6.8 and 6.1.1.4' 
 'Cl'  'Cl'   0.1484   0.1585 
 'International Tables Vol C Tables 4.2.6.8 and 6.1.1.4' 
  
_symmetry_cell_setting            Monoclinic 
_symmetry_space_group_name_H-M    P2(1)/c 
  
loop_ 
 _symmetry_equiv_pos_as_xyz 
 'x, y, z' 
 '-x, y+1/2, -z+1/2' 
 '-x, -y, -z' 
 'x, -y-1/2, z-1/2' 
  
_cell_length_a                    15.275(3) 
_cell_length_b                    17.059(3) 
_cell_length_c                    12.377(2) 
_cell_angle_alpha                 90.00 
_cell_angle_beta                  109.805(4) 
_cell_angle_gamma                 90.00 
_cell_volume                      3034.2(9) 
_cell_formula_units_Z             4 
_cell_measurement_temperature     295(2) 
_cell_measurement_reflns_used     ? 
_cell_measurement_theta_min       ? 
_cell_measurement_theta_max       ? 
  
_exptl_crystal_description        PLATE 
_exptl_crystal_colour             YELLOW 
_exptl_crystal_size_max           0.03 
_exptl_crystal_size_mid           0.10 
_exptl_crystal_size_min           0.11 
_exptl_crystal_density_meas       ? 
_exptl_crystal_density_diffrn     1.678 
_exptl_crystal_density_method     'not measured' 
_exptl_crystal_F_000              1504 
_exptl_absorpt_coefficient_mu     4.286 
_exptl_absorpt_correction_type    SADABS 
_exptl_absorpt_correction_T_min   0.7695 
_exptl_absorpt_correction_T_max   1.0000 
_exptl_absorpt_process_details    ? 
  
_exptl_special_details 
; 
 ? 
; 
  
_diffrn_ambient_temperature       295(2) 
_diffrn_radiation_wavelength      0.71073 
_diffrn_radiation_type            MoK\a 
_diffrn_radiation_source          'fine-focus sealed tube' 
_diffrn_radiation_monochromator   graphite 
_diffrn_measurement_device_type   'CCD area detector' 
_diffrn_measurement_method        'phi and omega scans' 
_diffrn_detector_area_resol_mean  ? 
_diffrn_standards_number          ? 
_diffrn_standards_interval_count  ? 
_diffrn_standards_interval_time   ? 
_diffrn_standards_decay_%         ? 
_diffrn_reflns_number             13402 
_diffrn_reflns_av_R_equivalents   0.0696 
_diffrn_reflns_av_sigmaI/netI     0.1034 
_diffrn_reflns_limit_h_min        -16 
_diffrn_reflns_limit_h_max        14 
_diffrn_reflns_limit_k_min        -18 
_diffrn_reflns_limit_k_max        18 
_diffrn_reflns_limit_l_min        -13 
_diffrn_reflns_limit_l_max        13 
_diffrn_reflns_theta_min          1.42 
_diffrn_reflns_theta_max          23.28 
_reflns_number_total              4357 
_reflns_number_gt                 2713 
_reflns_threshold_expression      >2sigma(I) 
  
_computing_data_collection        'Bruker SMART' 
_computing_cell_refinement        'Bruker SMART' 
_computing_data_reduction         'Bruker SHELXTL' 
_computing_structure_solution     'SHELXS-97 (Sheldrick, 1990)' 
_computing_structure_refinement   'SHELXL-97 (Sheldrick, 1997)' 
_computing_molecular_graphics     'Bruker SHELXTL' 
_computing_publication_material   'Bruker SHELXTL' 
  
_refine_special_details 
; 
 Refinement of F^2^ against ALL reflections.  The weighted R-factor wR and 
 goodness of fit S are based on F^2^, conventional R-factors R are based 
 on F, with F set to zero for negative F^2^. The threshold expression of 
 F^2^ > 2sigma(F^2^) is used only for calculating R-factors(gt) etc. and is 
 not relevant to the choice of reflections for refinement.  R-factors based 
 on F^2^ are statistically about twice as large as those based on F, and R- 
 factors based on ALL data will be even larger. 
; 
  
_refine_ls_structure_factor_coef  Fsqd 
_refine_ls_matrix_type            full 
_refine_ls_weighting_scheme       calc 
_refine_ls_weighting_details 
 'calc w=1/[\s^2^(Fo^2^)+(0.0001P)^2^+0.0000P] where P=(Fo^2^+2Fc^2^)/3' 
_atom_sites_solution_primary      direct 
_atom_sites_solution_secondary    difmap 
_atom_sites_solution_hydrogens    geom 
_refine_ls_hydrogen_treatment     mixed 
_refine_ls_extinction_method      none 
_refine_ls_extinction_coef        ? 
_refine_ls_number_reflns          4357 
_refine_ls_number_parameters      367 
_refine_ls_number_restraints      0 
_refine_ls_R_factor_all           0.0755 
_refine_ls_R_factor_gt            0.0389 
_refine_ls_wR_factor_ref          0.0591 
_refine_ls_wR_factor_gt           0.0546 
_refine_ls_goodness_of_fit_ref    0.929 
_refine_ls_restrained_S_all       0.929 
_refine_ls_shift/su_max           0.018 
_refine_ls_shift/su_mean          0.002 
  
loop_ 
 _atom_site_label 
 _atom_site_type_symbol 
 _atom_site_fract_x 
 _atom_site_fract_y 
 _atom_site_fract_z 
 _atom_site_U_iso_or_equiv 
 _atom_site_adp_type 
 _atom_site_occupancy 
 _atom_site_symmetry_multiplicity 
 _atom_site_calc_flag 
 _atom_site_refinement_flags 
 _atom_site_disorder_assembly 
 _atom_site_disorder_group 
Re1 Re 0.24289(3) 0.108004(19) 0.46813(3) 0.03933(11) Uani 1 1 d . . . 
S1 S 0.11089(18) 0.18722(11) 0.48596(19) 0.0462(7) Uani 1 1 d . . . 
C1 C 0.3338(7) 0.0390(5) 0.4545(7) 0.050(3) Uani 1 1 d . . . 
O1 O 0.3915(6) -0.0049(4) 0.4419(7) 0.097(3) Uani 1 1 d . . . 
C2 C 0.2622(6) 0.1681(4) 0.3491(8) 0.048(3) Uani 1 1 d . . . 
O2 O 0.2725(5) 0.2040(3) 0.2738(5) 0.068(2) Uani 1 1 d . . . 
C3 C 0.3380(6) 0.1650(5) 0.5780(8) 0.047(3) Uani 1 1 d . . . 
O3 O 0.3975(5) 0.1977(4) 0.6485(6) 0.074(2) Uani 1 1 d . . . 
C4 C 0.1293(6) 0.2887(4) 0.5019(6) 0.036(2) Uani 1 1 d . . . 
N1 N 0.2100(5) 0.0316(4) 0.5903(6) 0.043(2) Uani 1 1 d . . . 
N2 N 0.1308(5) 0.0338(3) 0.3668(6) 0.038(2) Uani 1 1 d . . . 
N3 N 0.0728(5) 0.3371(3) 0.5267(5) 0.0403(19) Uani 1 1 d . . . 
N4 N 0.2061(6) 0.3177(4) 0.4840(6) 0.049(2) Uani 1 1 d . . . 
H4 H 0.242(5) 0.289(3) 0.476(5) 0.000(18) Uiso 1 1 d . . . 
C21 C 0.2535(7) 0.0337(5) 0.7046(8) 0.055(3) Uani 1 1 d . . . 
H21 H 0.2980 0.0724 0.7350 0.066 Uiso 1 1 calc R . . 
C22 C 0.2350(8) -0.0191(5) 0.7789(8) 0.063(3) Uani 1 1 d . . . 
H22 H 0.2663 -0.0163 0.8577 0.076 Uiso 1 1 calc R . . 
C23 C 0.1694(8) -0.0753(5) 0.7328(8) 0.065(3) Uani 1 1 d . . . 
H23 H 0.1550 -0.1109 0.7812 0.078 Uiso 1 1 calc R . . 
C24 C 0.1241(7) -0.0804(4) 0.6164(8) 0.051(3) Uani 1 1 d . . . 
H24 H 0.0809 -0.1199 0.5854 0.061 Uiso 1 1 calc R . . 
C25 C 0.1444(7) -0.0251(4) 0.5462(7) 0.041(2) Uani 1 1 d . . . 
C26 C 0.0986(6) -0.0217(4) 0.4210(7) 0.037(2) Uani 1 1 d . . . 
C27 C 0.0251(7) -0.0711(4) 0.3611(8) 0.053(3) Uani 1 1 d . . . 
H27 H 0.0033 -0.1089 0.4000 0.063 Uiso 1 1 calc R . . 
C28 C -0.0146(7) -0.0632(5) 0.2438(8) 0.060(3) Uani 1 1 d . . . 
H28 H -0.0631 -0.0958 0.2022 0.073 Uiso 1 1 calc R . . 
C29 C 0.0182(7) -0.0070(5) 0.1900(8) 0.052(3) Uani 1 1 d . . . 
H29 H -0.0075 -0.0006 0.1108 0.063 Uiso 1 1 calc R . . 
C30 C 0.0893(7) 0.0401(4) 0.2531(8) 0.046(3) Uani 1 1 d . . . 
H30 H 0.1101 0.0788 0.2149 0.056 Uiso 1 1 calc R . . 
C41 C 0.2623(7) 0.3857(5) 0.5253(7) 0.042(2) Uani 1 1 d . . . 
C42 C 0.2262(7) 0.4506(5) 0.5630(7) 0.058(3) Uani 1 1 d . . . 
H42 H 0.1644 0.4531 0.5593 0.069 Uiso 1 1 calc R . . 
C43 C 0.2901(9) 0.5131(5) 0.6080(8) 0.069(3) Uani 1 1 d . . . 
H43 H 0.2689 0.5563 0.6380 0.082 Uiso 1 1 calc R . . 
C44 C 0.3786(10) 0.5143(7) 0.6103(9) 0.081(4) Uani 1 1 d . . . 
C45 C 0.4084(7) 0.4498(6) 0.5663(9) 0.072(3) Uani 1 1 d . . . 
H45 H 0.4689 0.4490 0.5651 0.086 Uiso 1 1 calc R . . 
C46 C 0.3515(6) 0.3862(6) 0.5240(7) 0.055(2) Uani 1 1 d . . . 
H46 H 0.3738 0.3435 0.4944 0.066 Uiso 1 1 calc R . . 
C47 C 0.4413(9) 0.5842(6) 0.6649(10) 0.150(6) Uani 1 1 d . . . 
H47A H 0.4310 0.5990 0.7345 0.225 Uiso 1 1 calc R . . 
H47B H 0.4267 0.6276 0.6124 0.225 Uiso 1 1 calc R . . 
H47C H 0.5053 0.5696 0.6821 0.225 Uiso 1 1 calc R . . 
C51 C -0.0042(7) 0.3067(4) 0.5522(8) 0.041(2) Uani 1 1 d . . . 
C52 C 0.0068(7) 0.2766(4) 0.6610(8) 0.050(3) Uani 1 1 d . . . 
H52 H 0.0656 0.2744 0.7167 0.060 Uiso 1 1 calc R . . 
C53 C -0.0691(8) 0.2502(5) 0.6859(8) 0.054(3) Uani 1 1 d . . . 
H53 H -0.0597 0.2309 0.7592 0.064 Uiso 1 1 calc R . . 
C54 C -0.1584(8) 0.2508(6) 0.6084(10) 0.061(3) Uani 1 1 d . . . 
C55 C -0.1666(8) 0.2838(5) 0.5027(9) 0.067(3) Uani 1 1 d . . . 
H55 H -0.2254 0.2868 0.4470 0.081 Uiso 1 1 calc R . . 
C56 C -0.0918(8) 0.3121(5) 0.4764(8) 0.058(3) Uani 1 1 d . . . 
H56 H -0.1018 0.3353 0.4053 0.069 Uiso 1 1 calc R . . 
C57 C -0.2407(8) 0.2191(5) 0.6347(9) 0.099(4) Uani 1 1 d . . . 
H57A H -0.2404 0.1628 0.6312 0.148 Uiso 1 1 calc R . . 
H57B H -0.2970 0.2387 0.5794 0.148 Uiso 1 1 calc R . . 
H57C H -0.2373 0.2354 0.7103 0.148 Uiso 1 1 calc R . . 
C90 C 0.5068(8) 0.1525(6) 0.3342(9) 0.106(4) Uani 1 1 d . . . 
H90A H 0.4908 0.0990 0.3464 0.127 Uiso 1 1 calc R . . 
H90B H 0.4572 0.1727 0.2681 0.127 Uiso 1 1 calc R . . 
Cl91 Cl 0.5100(3) 0.2065(2) 0.4508(3) 0.1251(13) Uani 1 1 d . . . 
Cl92 Cl 0.6048(3) 0.1507(2) 0.3023(4) 0.1786(19) Uani 1 1 d . . . 
  
loop_ 
 _atom_site_aniso_label 
 _atom_site_aniso_U_11 
 _atom_site_aniso_U_22 
 _atom_site_aniso_U_33 
 _atom_site_aniso_U_23 
 _atom_site_aniso_U_13 
 _atom_site_aniso_U_12 
Re1 0.0410(2) 0.03453(17) 0.0440(2) 0.0007(2) 0.01647(17) -0.0025(3) 
S1 0.0474(18) 0.0334(12) 0.0615(16) -0.0050(12) 0.0232(15) -0.0056(13) 
C1 0.034(7) 0.061(7) 0.045(6) 0.016(5) 0.002(6) -0.025(6) 
O1 0.082(7) 0.075(5) 0.142(8) 0.002(5) 0.047(6) 0.029(5) 
C2 0.035(7) 0.036(5) 0.083(8) -0.020(5) 0.034(6) 0.004(5) 
O2 0.081(6) 0.072(4) 0.062(5) 0.007(4) 0.041(4) -0.013(4) 
C3 0.022(6) 0.049(6) 0.074(8) 0.023(5) 0.024(6) 0.004(5) 
O3 0.057(6) 0.068(5) 0.084(6) -0.003(4) 0.008(5) -0.018(4) 
C4 0.029(6) 0.042(5) 0.036(5) -0.004(4) 0.010(5) -0.016(5) 
N1 0.042(6) 0.035(4) 0.061(6) -0.006(4) 0.029(5) 0.003(4) 
N2 0.053(6) 0.031(4) 0.035(5) 0.004(4) 0.021(5) 0.011(4) 
N3 0.040(5) 0.037(4) 0.051(5) -0.008(4) 0.024(4) -0.003(4) 
N4 0.055(7) 0.040(5) 0.061(6) -0.005(4) 0.031(5) 0.012(5) 
C21 0.069(9) 0.044(6) 0.045(6) -0.008(5) 0.010(6) -0.010(6) 
C22 0.082(10) 0.058(6) 0.049(7) 0.008(6) 0.020(7) 0.001(7) 
C23 0.095(10) 0.059(7) 0.052(7) 0.016(6) 0.040(7) 0.002(6) 
C24 0.053(7) 0.040(6) 0.063(7) 0.006(5) 0.025(6) 0.002(5) 
C25 0.053(7) 0.026(5) 0.048(6) -0.003(5) 0.022(6) -0.001(5) 
C26 0.047(7) 0.023(4) 0.044(6) 0.003(5) 0.019(6) 0.006(5) 
C27 0.066(8) 0.034(5) 0.059(7) -0.016(5) 0.023(6) -0.020(5) 
C28 0.072(9) 0.056(6) 0.050(7) -0.024(6) 0.016(7) -0.007(6) 
C29 0.062(8) 0.054(6) 0.042(6) 0.000(5) 0.020(6) -0.002(6) 
C30 0.050(7) 0.036(5) 0.056(7) -0.004(5) 0.022(6) -0.010(5) 
C41 0.058(7) 0.028(4) 0.041(5) 0.004(5) 0.018(5) -0.013(7) 
C42 0.069(9) 0.052(6) 0.061(7) -0.006(5) 0.035(7) -0.010(6) 
C43 0.093(11) 0.045(6) 0.070(8) -0.021(5) 0.030(8) -0.014(7) 
C44 0.078(11) 0.077(9) 0.078(9) -0.001(7) 0.013(8) -0.013(9) 
C45 0.034(7) 0.067(7) 0.109(9) 0.008(7) 0.017(7) -0.010(7) 
C46 0.035(6) 0.050(6) 0.075(7) -0.002(6) 0.013(6) -0.010(6) 
C47 0.116(13) 0.113(11) 0.204(15) -0.046(10) 0.030(11) -0.080(10) 
C51 0.051(8) 0.028(5) 0.047(6) -0.007(5) 0.021(6) 0.001(5) 
C52 0.041(8) 0.047(6) 0.053(7) 0.001(5) 0.004(6) -0.003(5) 
C53 0.058(8) 0.051(6) 0.058(7) 0.003(5) 0.026(7) -0.001(6) 
C54 0.057(9) 0.058(7) 0.078(9) -0.030(6) 0.034(8) -0.012(7) 
C55 0.051(9) 0.091(8) 0.053(7) -0.019(6) 0.010(7) -0.015(7) 
C56 0.053(8) 0.082(7) 0.038(6) -0.001(6) 0.015(6) 0.008(7) 
C57 0.080(10) 0.117(9) 0.117(10) -0.015(8) 0.057(9) -0.026(8) 
C90 0.081(11) 0.124(10) 0.119(11) 0.002(8) 0.043(9) 0.003(8) 
Cl91 0.089(3) 0.163(3) 0.125(3) -0.034(2) 0.039(3) -0.009(3) 
Cl92 0.109(4) 0.260(5) 0.196(4) -0.067(3) 0.090(3) -0.014(4) 
  
_geom_special_details 
; 
 All esds (except the esd in the dihedral angle between two l.s. planes) 
 are estimated using the full covariance matrix.  The cell esds are taken 
 into account individually in the estimation of esds in distances, angles 
 and torsion angles; correlations between esds in cell parameters are only 
 used when they are defined by crystal symmetry.  An approximate (isotropic) 
 treatment of cell esds is used for estimating esds involving l.s. planes. 
; 
  
loop_ 
 _geom_bond_atom_site_label_1 
 _geom_bond_atom_site_label_2 
 _geom_bond_distance 
 _geom_bond_site_symmetry_2 
 _geom_bond_publ_flag 
Re1 C1 1.872(11) . ? 
Re1 C3 1.888(10) . ? 
Re1 C2 1.898(9) . ? 
Re1 N2 2.156(7) . ? 
Re1 N1 2.180(6) . ? 
Re1 S1 2.498(2) . ? 
S1 C4 1.755(8) . ? 
C1 O1 1.206(10) . ? 
C2 O2 1.169(8) . ? 
C3 O3 1.167(10) . ? 
C4 N3 1.302(9) . ? 
C4 N4 1.359(10) . ? 
N1 C21 1.345(9) . ? 
N1 C25 1.366(10) . ? 
N2 C30 1.338(9) . ? 
N2 C26 1.346(9) . ? 
N3 C51 1.416(10) . ? 
N4 C41 1.431(10) . ? 
C21 C22 1.384(10) . ? 
C22 C23 1.365(12) . ? 
C23 C24 1.374(11) . ? 
C24 C25 1.388(9) . ? 
C25 C26 1.469(10) . ? 
C26 C27 1.399(11) . ? 
C27 C28 1.378(10) . ? 
C28 C29 1.356(10) . ? 
C29 C30 1.363(11) . ? 
C41 C46 1.367(11) . ? 
C41 C42 1.387(10) . ? 
C42 C43 1.426(12) . ? 
C43 C44 1.343(14) . ? 
C44 C45 1.372(12) . ? 
C44 C47 1.535(13) . ? 
C45 C46 1.378(11) . ? 
C51 C56 1.352(12) . ? 
C51 C52 1.397(10) . ? 
C52 C53 1.372(11) . ? 
C53 C54 1.377(13) . ? 
C54 C55 1.390(12) . ? 
C54 C57 1.502(12) . ? 
C55 C56 1.376(12) . ? 
C90 Cl92 1.672(10) . ? 
C90 Cl91 1.699(10) . ? 
  
loop_ 
 _geom_angle_atom_site_label_1 
 _geom_angle_atom_site_label_2 
 _geom_angle_atom_site_label_3 
 _geom_angle 
 _geom_angle_site_symmetry_1 
 _geom_angle_site_symmetry_3 
 _geom_angle_publ_flag 
C1 Re1 C3 88.6(4) . . ? 
C1 Re1 C2 87.4(3) . . ? 
C3 Re1 C2 89.8(4) . . ? 
C1 Re1 N2 92.6(3) . . ? 
C3 Re1 N2 170.5(3) . . ? 
C2 Re1 N2 99.6(3) . . ? 
C1 Re1 N1 92.2(3) . . ? 
C3 Re1 N1 96.3(3) . . ? 
C2 Re1 N1 173.8(3) . . ? 
N2 Re1 N1 74.2(3) . . ? 
C1 Re1 S1 173.7(3) . . ? 
C3 Re1 S1 96.0(3) . . ? 
C2 Re1 S1 96.8(2) . . ? 
N2 Re1 S1 82.16(17) . . ? 
N1 Re1 S1 83.11(17) . . ? 
C4 S1 Re1 116.1(3) . . ? 
O1 C1 Re1 177.9(8) . . ? 
O2 C2 Re1 178.3(8) . . ? 
O3 C3 Re1 177.4(8) . . ? 
N3 C4 N4 119.0(7) . . ? 
N3 C4 S1 123.9(7) . . ? 
N4 C4 S1 117.1(7) . . ? 
C21 N1 C25 118.3(7) . . ? 
C21 N1 Re1 124.5(6) . . ? 
C25 N1 Re1 117.1(6) . . ? 
C30 N2 C26 117.2(8) . . ? 
C30 N2 Re1 124.4(6) . . ? 
C26 N2 Re1 118.4(6) . . ? 
C4 N3 C51 119.2(7) . . ? 
C4 N4 C41 133.1(8) . . ? 
N1 C21 C22 122.9(9) . . ? 
C23 C22 C21 117.8(9) . . ? 
C22 C23 C24 121.3(8) . . ? 
C23 C24 C25 118.3(9) . . ? 
N1 C25 C24 121.4(8) . . ? 
N1 C25 C26 114.6(7) . . ? 
C24 C25 C26 124.0(8) . . ? 
N2 C26 C27 121.6(8) . . ? 
N2 C26 C25 115.4(8) . . ? 
C27 C26 C25 123.0(8) . . ? 
C28 C27 C26 119.1(8) . . ? 
C29 C28 C27 118.9(9) . . ? 
C28 C29 C30 119.3(9) . . ? 
N2 C30 C29 123.9(8) . . ? 
C46 C41 C42 120.8(9) . . ? 
C46 C41 N4 118.7(8) . . ? 
C42 C41 N4 120.5(9) . . ? 
C41 C42 C43 115.5(9) . . ? 
C44 C43 C42 124.8(10) . . ? 
C43 C44 C45 116.6(11) . . ? 
C43 C44 C47 119.6(11) . . ? 
C45 C44 C47 123.8(12) . . ? 
C44 C45 C46 122.1(11) . . ? 
C41 C46 C45 120.2(9) . . ? 
C56 C51 C52 117.4(9) . . ? 
C56 C51 N3 121.5(9) . . ? 
C52 C51 N3 120.8(9) . . ? 
C53 C52 C51 120.2(10) . . ? 
C52 C53 C54 123.7(9) . . ? 
C53 C54 C55 114.2(10) . . ? 
C53 C54 C57 123.4(11) . . ? 
C55 C54 C57 122.4(11) . . ? 
C56 C55 C54 123.2(10) . . ? 
C51 C56 C55 121.2(9) . . ? 
Cl92 C90 Cl91 116.1(7) . . ? 
  
_diffrn_measured_fraction_theta_max    0.998 
_diffrn_reflns_theta_full              23.28 
_diffrn_measured_fraction_theta_full   0.998 
_refine_diff_density_max    0.889 
_refine_diff_density_min   -0.822 
_refine_diff_density_rms    0.110 
  
#===END

data_Compound_3_(ehf30bm) 
  
_audit_creation_method            SHELXL-97 
_chemical_name_systematic 
; 
 ? 
; 
_chemical_name_common             ? 
_chemical_melting_point           ? 
_chemical_formula_moiety          ? 
_chemical_formula_sum 
 'C38 H34 N3 O5 Re' 
_chemical_formula_weight          798.88 
  
loop_ 
 _atom_type_symbol 
 _atom_type_description 
 _atom_type_scat_dispersion_real 
 _atom_type_scat_dispersion_imag 
 _atom_type_scat_source 
 'C'  'C'   0.0033   0.0016 
 'International Tables Vol C Tables 4.2.6.8 and 6.1.1.4' 
 'H'  'H'   0.0000   0.0000 
 'International Tables Vol C Tables 4.2.6.8 and 6.1.1.4' 
 'N'  'N'   0.0061   0.0033 
 'International Tables Vol C Tables 4.2.6.8 and 6.1.1.4' 
 'O'  'O'   0.0106   0.0060 
 'International Tables Vol C Tables 4.2.6.8 and 6.1.1.4' 
 'Re'  'Re'  -1.0185   7.2310 
 'International Tables Vol C Tables 4.2.6.8 and 6.1.1.4' 
  
_symmetry_cell_setting            Triclinic 
_symmetry_space_group_name_H-M    P-1 
  
loop_ 
 _symmetry_equiv_pos_as_xyz 
 'x, y, z' 
 '-x, -y, -z' 
  
_cell_length_a                    8.7734(17) 
_cell_length_b                    11.721(2) 
_cell_length_c                    16.512(3) 
_cell_angle_alpha                 101.297(4) 
_cell_angle_beta                  90.510(4) 
_cell_angle_gamma                 99.202(4) 
_cell_volume                      1642.2(6) 
_cell_formula_units_Z             2 
_cell_measurement_temperature     293(2) 
_cell_measurement_reflns_used     ? 
_cell_measurement_theta_min       ? 
_cell_measurement_theta_max       ? 
  
_exptl_crystal_description        NEEDLE 
_exptl_crystal_colour             YELLOW 
_exptl_crystal_size_max           0.04 
_exptl_crystal_size_mid           0.08 
_exptl_crystal_size_min           0.19 
_exptl_crystal_density_meas       ? 
_exptl_crystal_density_diffrn     1.616 
_exptl_crystal_density_method     'not measured' 
_exptl_crystal_F_000              796 
_exptl_absorpt_coefficient_mu     3.749 
_exptl_absorpt_correction_type    SADABS 
_exptl_absorpt_correction_T_min   0.779172 
_exptl_absorpt_correction_T_max   1.000000 
_exptl_absorpt_process_details    ? 
  
_exptl_special_details 
; 
 ? 
; 
  
_diffrn_ambient_temperature       293(2) 
_diffrn_radiation_wavelength      0.71073 
_diffrn_radiation_type            MoK\a 
_diffrn_radiation_source          'fine-focus sealed tube' 
_diffrn_radiation_monochromator   graphite 
_diffrn_measurement_device_type   'CCD area detector' 
_diffrn_measurement_method        'phi and omega scans' 
_diffrn_detector_area_resol_mean  ? 
_diffrn_standards_number          ? 
_diffrn_standards_interval_count  ? 
_diffrn_standards_interval_time   ? 
_diffrn_standards_decay_%         ? 
_diffrn_reflns_number             10760 
_diffrn_reflns_av_R_equivalents   0.0413 
_diffrn_reflns_av_sigmaI/netI     0.0696 
_diffrn_reflns_limit_h_min        -9 
_diffrn_reflns_limit_h_max        9 
_diffrn_reflns_limit_k_min        -12 
_diffrn_reflns_limit_k_max        13 
_diffrn_reflns_limit_l_min        -18 
_diffrn_reflns_limit_l_max        18 
_diffrn_reflns_theta_min          1.26 
_diffrn_reflns_theta_max          23.32 
_reflns_number_total              4725 
_reflns_number_gt                 3786 
_reflns_threshold_expression      >2sigma(I) 
  
_computing_data_collection        'Bruker SMART' 
_computing_cell_refinement        'Bruker SMART' 
_computing_data_reduction         'Bruker SHELXTL' 
_computing_structure_solution     'SHELXS-97 (Sheldrick, 1990)' 
_computing_structure_refinement   'SHELXL-97 (Sheldrick, 1997)' 
_computing_molecular_graphics     'Bruker SHELXTL' 
_computing_publication_material   'Bruker SHELXTL' 
  
_refine_special_details 
; 
 Refinement of F^2^ against ALL reflections.  The weighted R-factor wR and 
 goodness of fit S are based on F^2^, conventional R-factors R are based 
 on F, with F set to zero for negative F^2^. The threshold expression of 
 F^2^ > 2sigma(F^2^) is used only for calculating R-factors(gt) etc. and is 
 not relevant to the choice of reflections for refinement.  R-factors based 
 on F^2^ are statistically about twice as large as those based on F, and R- 
 factors based on ALL data will be even larger. 
; 
  
_refine_ls_structure_factor_coef  Fsqd 
_refine_ls_matrix_type            full 
_refine_ls_weighting_scheme       calc 
_refine_ls_weighting_details 
 'calc w=1/[\s^2^(Fo^2^)+(0.0380P)^2^+0.0000P] where P=(Fo^2^+2Fc^2^)/3' 
_atom_sites_solution_primary      direct 
_atom_sites_solution_secondary    difmap 
_atom_sites_solution_hydrogens    geom 
_refine_ls_hydrogen_treatment     mixed 
_refine_ls_extinction_method      none 
_refine_ls_extinction_coef        ? 
_refine_ls_number_reflns          4725 
_refine_ls_number_parameters      425 
_refine_ls_number_restraints      0 
_refine_ls_R_factor_all           0.0464 
_refine_ls_R_factor_gt            0.0324 
_refine_ls_wR_factor_ref          0.0875 
_refine_ls_wR_factor_gt           0.0657 
_refine_ls_goodness_of_fit_ref    1.004 
_refine_ls_restrained_S_all       1.004 
_refine_ls_shift/su_max           0.034 
_refine_ls_shift/su_mean          0.002 
  
loop_ 
 _atom_site_label 
 _atom_site_type_symbol 
 _atom_site_fract_x 
 _atom_site_fract_y 
 _atom_site_fract_z 
 _atom_site_U_iso_or_equiv 
 _atom_site_adp_type 
 _atom_site_occupancy 
 _atom_site_symmetry_multiplicity 
 _atom_site_calc_flag 
 _atom_site_refinement_flags 
 _atom_site_disorder_assembly 
 _atom_site_disorder_group 
Re1 Re 0.53556(4) 0.81843(3) 0.65214(2) 0.04334(13) Uani 1 1 d . . . 
N1 N 0.7400(7) 0.7347(5) 0.6471(4) 0.0433(15) Uani 1 1 d . . . 
N2 N 0.6949(7) 0.9248(5) 0.7519(4) 0.0429(15) Uani 1 1 d . . . 
N3 N 0.4654(7) 0.7124(5) 0.7446(4) 0.0420(15) Uani 1 1 d . . . 
C1 C 0.6119(9) 0.9102(7) 0.5746(6) 0.056(2) Uani 1 1 d . . . 
O1 O 0.6541(8) 0.9643(6) 0.5241(4) 0.087(2) Uani 1 1 d . . . 
C2 C 0.4121(10) 0.7153(8) 0.5661(5) 0.060(2) Uani 1 1 d . . . 
O2 O 0.3374(8) 0.6504(6) 0.5123(4) 0.097(2) Uani 1 1 d . . . 
C3 C 0.3686(10) 0.9054(8) 0.6691(5) 0.058(2) Uani 1 1 d . . . 
O3 O 0.2732(7) 0.9634(6) 0.6784(4) 0.084(2) Uani 1 1 d . . . 
C4 C 0.3897(8) 0.7521(7) 0.8113(4) 0.0446(19) Uani 1 1 d . . . 
O4 O 0.3460(6) 0.8482(4) 0.8224(3) 0.0576(15) Uani 1 1 d . . . 
C5 C 0.3580(9) 0.6764(6) 0.8766(5) 0.048(2) Uani 1 1 d . . . 
H5 H 0.3881 0.5999 0.8538 0.058 Uiso 1 1 calc R . . 
C11 C 0.7557(9) 0.6327(7) 0.5949(5) 0.057(2) Uani 1 1 d . . . 
H11 H 0.6749 0.5965 0.5570 0.069 Uiso 1 1 calc R . . 
C12 C 0.8836(10) 0.5806(8) 0.5952(6) 0.070(3) Uani 1 1 d . . . 
H12 H 0.8903 0.5107 0.5585 0.084 Uiso 1 1 calc R . . 
C13 C 1.0008(10) 0.6332(9) 0.6504(6) 0.077(3) Uani 1 1 d . . . 
H13 H 1.0893 0.5991 0.6515 0.093 Uiso 1 1 calc R . . 
C14 C 0.9910(9) 0.7361(8) 0.7047(6) 0.064(2) Uani 1 1 d . . . 
H14 H 1.0721 0.7721 0.7424 0.077 Uiso 1 1 calc R . . 
C15 C 0.8590(8) 0.7853(7) 0.7024(4) 0.0455(19) Uani 1 1 d . . . 
C16 C 0.8339(9) 0.8929(6) 0.7585(5) 0.0452(19) Uani 1 1 d . . . 
C17 C 0.9448(10) 0.9580(8) 0.8169(6) 0.070(3) Uani 1 1 d . . . 
H17 H 1.0406 0.9349 0.8212 0.084 Uiso 1 1 calc R . . 
C18 C 0.9115(12) 1.0564(9) 0.8681(6) 0.078(3) Uani 1 1 d . . . 
H18 H 0.9861 1.1022 0.9064 0.094 Uiso 1 1 calc R . . 
C19 C 0.7680(11) 1.0878(8) 0.8630(5) 0.069(3) Uani 1 1 d . . . 
H19 H 0.7426 1.1532 0.8988 0.083 Uiso 1 1 calc R . . 
C20 C 0.6638(10) 1.0206(7) 0.8040(5) 0.055(2) Uani 1 1 d . . . 
H20 H 0.5670 1.0421 0.7998 0.066 Uiso 1 1 calc R . . 
C31 C 0.4929(9) 0.5904(7) 0.7265(5) 0.055(2) Uani 1 1 d . . . 
C32 C 0.4003(10) 0.5030(8) 0.6691(6) 0.069(3) Uani 1 1 d . . . 
H32 H 0.3181 0.5227 0.6418 0.083 Uiso 1 1 calc R . . 
C33 C 0.4273(11) 0.3895(8) 0.6521(6) 0.076(3) Uani 1 1 d . . . 
H33 H 0.3631 0.3335 0.6136 0.091 Uiso 1 1 calc R . . 
C34 C 0.5467(11) 0.3566(8) 0.6905(6) 0.070(3) Uani 1 1 d . . . 
C35 C 0.6413(11) 0.4422(8) 0.7456(6) 0.074(3) Uani 1 1 d . . . 
H35 H 0.7254 0.4222 0.7710 0.089 Uiso 1 1 calc R . . 
C36 C 0.6151(10) 0.5569(8) 0.7641(5) 0.065(2) Uani 1 1 d . . . 
H36 H 0.6804 0.6125 0.8023 0.078 Uiso 1 1 calc R . . 
C37 C 0.5720(14) 0.2308(8) 0.6720(7) 0.109(4) Uani 1 1 d . . . 
H37A H 0.6083 0.2122 0.6171 0.163 Uiso 1 1 calc R . . 
H37B H 0.4764 0.1798 0.6762 0.163 Uiso 1 1 calc R . . 
H37C H 0.6475 0.2199 0.7110 0.163 Uiso 1 1 calc R . . 
C41 C 0.1877(9) 0.6524(8) 0.8943(5) 0.054(2) Uani 1 1 d . . . 
C42 C 0.1101(12) 0.5377(9) 0.8820(6) 0.081(3) Uani 1 1 d . . . 
H42 H 0.1610 0.4755 0.8602 0.098 Uiso 1 1 calc R . . 
C43 C -0.0440(15) 0.5148(14) 0.9022(8) 0.120(5) Uani 1 1 d . . . 
H43 H -0.0945 0.4374 0.8958 0.144 Uiso 1 1 calc R . . 
C44 C -0.1197(14) 0.6041(17) 0.9308(8) 0.118(5) Uani 1 1 d . . . 
H44 H -0.2230 0.5880 0.9435 0.142 Uiso 1 1 calc R . . 
C45 C -0.0484(12) 0.7165(12) 0.9415(6) 0.086(3) Uani 1 1 d . . . 
H45 H -0.1030 0.7780 0.9594 0.103 Uiso 1 1 calc R . . 
C46 C 0.1081(10) 0.7405(8) 0.9257(5) 0.066(2) Uani 1 1 d . . . 
H46 H 0.1590 0.8181 0.9368 0.079 Uiso 1 1 calc R . . 
C51 C 0.4563(8) 0.7278(7) 0.9565(5) 0.0457(19) Uani 1 1 d . . . 
C52 C 0.4615(10) 0.6586(8) 1.0149(6) 0.064(2) Uani 1 1 d . . . 
H52 H 0.4043 0.5829 1.0054 0.076 Uiso 1 1 calc R . . 
C53 C 0.5499(12) 0.6999(11) 1.0869(6) 0.082(3) Uani 1 1 d . . . 
H53 H 0.5546 0.6511 1.1246 0.099 Uiso 1 1 calc R . . 
C54 C 0.6319(11) 0.8132(11) 1.1037(6) 0.080(3) Uani 1 1 d . . . 
H54 H 0.6895 0.8423 1.1530 0.096 Uiso 1 1 calc R . . 
C55 C 0.6260(10) 0.8806(8) 1.0463(6) 0.068(2) Uani 1 1 d . . . 
H55 H 0.6823 0.9566 1.0558 0.082 Uiso 1 1 calc R . . 
C56 C 0.5380(10) 0.8383(8) 0.9741(5) 0.060(2) Uani 1 1 d . . . 
H56 H 0.5346 0.8872 0.9362 0.072 Uiso 1 1 calc R . . 
O91 O 0.0320(14) 0.3156(10) 0.5930(10) 0.174(4) Uani 1 1 d . . . 
C92 C 0.018(2) 0.311(2) 0.6756(12) 0.179(9) Uani 1 1 d . . . 
H92A H -0.0857 0.3223 0.6907 0.214 Uiso 1 1 calc R . . 
H92B H 0.0887 0.3772 0.7076 0.214 Uiso 1 1 calc R . . 
C93 C 0.015(2) 0.1313(17) 0.6210(17) 0.196(10) Uani 1 1 d . . . 
H93A H -0.0825 0.0792 0.6227 0.235 Uiso 1 1 calc R . . 
H93B H 0.0944 0.0826 0.6096 0.235 Uiso 1 1 calc R . . 
C94 C 0.0039(18) 0.1928(17) 0.5530(10) 0.158(6) Uani 1 1 d . . . 
H94A H 0.0811 0.1753 0.5128 0.189 Uiso 1 1 calc R . . 
H94B H -0.0978 0.1711 0.5255 0.189 Uiso 1 1 calc R . . 
C95 C 0.048(4) 0.205(3) 0.7000(14) 0.280(17) Uani 1 1 d . . . 
H95A H 0.1544 0.2111 0.7190 0.336 Uiso 1 1 calc R . . 
H95B H -0.0216 0.1818 0.7412 0.336 Uiso 1 1 calc R . . 
  
loop_ 
 _atom_site_aniso_label 
 _atom_site_aniso_U_11 
 _atom_site_aniso_U_22 
 _atom_site_aniso_U_33 
 _atom_site_aniso_U_23 
 _atom_site_aniso_U_13 
 _atom_site_aniso_U_12 
Re1 0.04243(19) 0.0468(2) 0.0419(2) 0.00901(14) 0.00193(13) 0.01063(14) 
N1 0.042(4) 0.045(4) 0.044(4) 0.006(3) 0.007(3) 0.012(3) 
N2 0.045(4) 0.042(4) 0.041(4) 0.007(3) 0.004(3) 0.005(3) 
N3 0.045(4) 0.035(4) 0.048(4) 0.006(3) 0.009(3) 0.013(3) 
C1 0.040(5) 0.061(6) 0.066(6) 0.008(5) 0.000(4) 0.012(4) 
O1 0.086(5) 0.103(5) 0.082(5) 0.051(4) 0.014(4) 0.009(4) 
C2 0.062(6) 0.060(6) 0.059(6) 0.010(5) 0.002(5) 0.012(5) 
O2 0.089(5) 0.103(6) 0.079(5) -0.010(4) -0.023(4) -0.005(4) 
C3 0.055(5) 0.062(6) 0.054(5) 0.016(5) -0.011(4) -0.004(5) 
O3 0.068(4) 0.091(5) 0.109(5) 0.033(4) 0.012(4) 0.046(4) 
C4 0.044(5) 0.048(5) 0.039(5) 0.002(4) 0.005(4) 0.004(4) 
O4 0.077(4) 0.044(3) 0.056(4) 0.005(3) 0.015(3) 0.026(3) 
C5 0.056(5) 0.040(4) 0.049(5) 0.007(4) 0.010(4) 0.010(4) 
C11 0.052(5) 0.058(6) 0.061(6) 0.008(5) 0.009(4) 0.009(5) 
C12 0.058(6) 0.062(6) 0.084(7) -0.009(5) 0.018(5) 0.023(5) 
C13 0.046(6) 0.087(7) 0.099(8) 0.004(6) 0.012(6) 0.028(5) 
C14 0.046(5) 0.066(6) 0.079(7) 0.004(5) -0.001(5) 0.016(5) 
C15 0.041(5) 0.053(5) 0.042(5) 0.011(4) 0.006(4) 0.005(4) 
C16 0.045(5) 0.045(5) 0.044(5) 0.010(4) 0.006(4) 0.005(4) 
C17 0.057(6) 0.072(6) 0.073(6) -0.003(5) -0.014(5) 0.007(5) 
C18 0.072(7) 0.078(7) 0.069(7) -0.006(6) -0.012(5) -0.007(6) 
C19 0.083(7) 0.054(6) 0.058(6) -0.012(5) 0.005(5) 0.002(5) 
C20 0.061(5) 0.052(5) 0.052(5) 0.006(4) 0.012(5) 0.015(5) 
C31 0.052(5) 0.063(6) 0.053(5) 0.013(5) 0.007(4) 0.012(5) 
C32 0.057(6) 0.067(6) 0.080(7) 0.005(5) -0.016(5) 0.012(5) 
C33 0.077(7) 0.047(6) 0.098(8) 0.006(5) -0.012(6) 0.010(5) 
C34 0.069(6) 0.060(6) 0.089(7) 0.020(5) 0.021(6) 0.020(5) 
C35 0.077(7) 0.066(7) 0.084(7) 0.022(6) -0.002(6) 0.018(6) 
C36 0.067(6) 0.061(6) 0.068(6) 0.012(5) -0.004(5) 0.011(5) 
C37 0.132(10) 0.065(7) 0.129(10) 0.013(7) -0.003(8) 0.027(7) 
C41 0.055(5) 0.068(6) 0.035(5) 0.010(4) 0.000(4) -0.003(5) 
C42 0.085(8) 0.077(7) 0.075(7) 0.013(6) -0.003(6) -0.004(6) 
C43 0.071(9) 0.153(14) 0.119(11) 0.049(10) -0.016(8) -0.055(9) 
C44 0.056(8) 0.209(18) 0.087(9) 0.041(11) 0.006(7) -0.001(10) 
C45 0.067(7) 0.130(10) 0.056(6) 0.003(7) 0.007(5) 0.017(7) 
C46 0.052(6) 0.083(7) 0.055(6) 0.000(5) 0.009(5) 0.004(5) 
C51 0.046(5) 0.041(5) 0.050(5) 0.007(4) 0.011(4) 0.009(4) 
C52 0.068(6) 0.061(6) 0.068(6) 0.026(5) 0.005(5) 0.013(5) 
C53 0.083(7) 0.106(9) 0.069(7) 0.031(7) 0.001(6) 0.032(7) 
C54 0.063(6) 0.112(9) 0.061(7) -0.004(7) 0.002(5) 0.032(7) 
C55 0.071(6) 0.059(6) 0.068(7) 0.005(5) -0.006(5) 0.007(5) 
C56 0.073(6) 0.062(6) 0.046(5) 0.008(4) 0.000(5) 0.015(5) 
O91 0.218(12) 0.124(9) 0.189(12) 0.032(9) -0.028(10) 0.059(8) 
C92 0.131(13) 0.27(3) 0.114(15) 0.007(17) 0.029(12) 0.010(15) 
C93 0.148(14) 0.170(18) 0.32(3) 0.17(2) -0.040(18) 0.026(12) 
C94 0.148(14) 0.157(15) 0.147(15) -0.029(13) 0.014(11) 0.034(12) 
C95 0.41(4) 0.32(4) 0.14(2) 0.12(2) 0.00(2) 0.06(3) 
  
_geom_special_details 
; 
 All esds (except the esd in the dihedral angle between two l.s. planes) 
 are estimated using the full covariance matrix.  The cell esds are taken 
 into account individually in the estimation of esds in distances, angles 
 and torsion angles; correlations between esds in cell parameters are only 
 used when they are defined by crystal symmetry.  An approximate (isotropic) 
 treatment of cell esds is used for estimating esds involving l.s. planes. 
; 
  
loop_ 
 _geom_bond_atom_site_label_1 
 _geom_bond_atom_site_label_2 
 _geom_bond_distance 
 _geom_bond_site_symmetry_2 
 _geom_bond_publ_flag 
Re1 C2 1.880(10) . ? 
Re1 C1 1.889(10) . ? 
Re1 C3 1.907(10) . ? 
Re1 N1 2.172(6) . ? 
Re1 N3 2.184(6) . ? 
Re1 N2 2.195(6) . ? 
N1 C11 1.357(9) . ? 
N1 C15 1.360(9) . ? 
N2 C16 1.341(9) . ? 
N2 C20 1.342(9) . ? 
N3 C4 1.333(8) . ? 
N3 C31 1.462(9) . ? 
C1 O1 1.172(9) . ? 
C2 O2 1.168(9) . ? 
C3 O3 1.153(9) . ? 
C4 O4 1.228(8) . ? 
C4 C5 1.527(10) . ? 
C5 C41 1.517(10) . ? 
C5 C51 1.533(10) . ? 
C11 C12 1.361(11) . ? 
C12 C13 1.351(11) . ? 
C13 C14 1.371(11) . ? 
C14 C15 1.377(10) . ? 
C15 C16 1.459(10) . ? 
C16 C17 1.384(10) . ? 
C17 C18 1.364(12) . ? 
C18 C19 1.373(12) . ? 
C19 C20 1.363(11) . ? 
C31 C36 1.381(11) . ? 
C31 C32 1.394(11) . ? 
C32 C33 1.364(11) . ? 
C33 C34 1.364(12) . ? 
C34 C35 1.373(12) . ? 
C34 C37 1.499(12) . ? 
C35 C36 1.376(11) . ? 
C41 C46 1.359(11) . ? 
C41 C42 1.382(11) . ? 
C42 C43 1.392(15) . ? 
C43 C44 1.339(17) . ? 
C44 C45 1.342(16) . ? 
C45 C46 1.395(12) . ? 
C51 C56 1.352(10) . ? 
C51 C52 1.381(10) . ? 
C52 C53 1.373(12) . ? 
C53 C54 1.379(13) . ? 
C54 C55 1.353(13) . ? 
C55 C56 1.377(11) . ? 
O91 C92 1.382(18) . ? 
O91 C94 1.443(16) . ? 
C92 C95 1.44(3) . ? 
C93 C95 1.42(3) . ? 
C93 C94 1.46(2) . ? 
  
loop_ 
 _geom_angle_atom_site_label_1 
 _geom_angle_atom_site_label_2 
 _geom_angle_atom_site_label_3 
 _geom_angle 
 _geom_angle_site_symmetry_1 
 _geom_angle_site_symmetry_3 
 _geom_angle_publ_flag 
C2 Re1 C1 88.4(4) . . ? 
C2 Re1 C3 87.0(3) . . ? 
C1 Re1 C3 88.8(3) . . ? 
C2 Re1 N1 100.3(3) . . ? 
C1 Re1 N1 92.2(3) . . ? 
C3 Re1 N1 172.6(3) . . ? 
C2 Re1 N3 94.3(3) . . ? 
C1 Re1 N3 175.7(3) . . ? 
C3 Re1 N3 94.7(3) . . ? 
N1 Re1 N3 84.0(2) . . ? 
C2 Re1 N2 174.1(3) . . ? 
C1 Re1 N2 93.2(3) . . ? 
C3 Re1 N2 98.7(3) . . ? 
N1 Re1 N2 73.9(2) . . ? 
N3 Re1 N2 83.7(2) . . ? 
C11 N1 C15 117.3(6) . . ? 
C11 N1 Re1 124.9(5) . . ? 
C15 N1 Re1 117.8(5) . . ? 
C16 N2 C20 118.7(7) . . ? 
C16 N2 Re1 116.9(5) . . ? 
C20 N2 Re1 124.3(5) . . ? 
C4 N3 C31 120.6(6) . . ? 
C4 N3 Re1 122.6(5) . . ? 
C31 N3 Re1 116.6(5) . . ? 
O1 C1 Re1 177.0(8) . . ? 
O2 C2 Re1 178.9(8) . . ? 
O3 C3 Re1 176.1(8) . . ? 
O4 C4 N3 122.3(7) . . ? 
O4 C4 C5 118.7(7) . . ? 
N3 C4 C5 119.0(7) . . ? 
C41 C5 C4 112.3(6) . . ? 
C41 C5 C51 111.1(6) . . ? 
C4 C5 C51 112.5(6) . . ? 
N1 C11 C12 123.3(8) . . ? 
C13 C12 C11 118.3(8) . . ? 
C12 C13 C14 120.9(8) . . ? 
C13 C14 C15 118.8(8) . . ? 
N1 C15 C14 121.5(7) . . ? 
N1 C15 C16 114.9(6) . . ? 
C14 C15 C16 123.7(7) . . ? 
N2 C16 C17 121.1(7) . . ? 
N2 C16 C15 116.3(7) . . ? 
C17 C16 C15 122.6(7) . . ? 
C18 C17 C16 119.1(8) . . ? 
C17 C18 C19 120.1(9) . . ? 
C20 C19 C18 118.1(8) . . ? 
N2 C20 C19 122.9(8) . . ? 
C36 C31 C32 116.8(8) . . ? 
C36 C31 N3 121.2(8) . . ? 
C32 C31 N3 122.0(7) . . ? 
C33 C32 C31 121.7(8) . . ? 
C34 C33 C32 121.2(9) . . ? 
C33 C34 C35 117.8(8) . . ? 
C33 C34 C37 120.3(10) . . ? 
C35 C34 C37 121.9(9) . . ? 
C34 C35 C36 121.7(9) . . ? 
C35 C36 C31 120.7(9) . . ? 
C46 C41 C42 117.8(8) . . ? 
C46 C41 C5 122.2(8) . . ? 
C42 C41 C5 120.0(8) . . ? 
C41 C42 C43 120.3(11) . . ? 
C44 C43 C42 120.2(13) . . ? 
C43 C44 C45 120.9(13) . . ? 
C44 C45 C46 119.5(11) . . ? 
C41 C46 C45 121.3(10) . . ? 
C56 C51 C52 117.4(8) . . ? 
C56 C51 C5 123.8(7) . . ? 
C52 C51 C5 118.8(7) . . ? 
C53 C52 C51 121.0(9) . . ? 
C52 C53 C54 120.6(10) . . ? 
C55 C54 C53 118.1(9) . . ? 
C54 C55 C56 121.0(9) . . ? 
C51 C56 C55 121.9(8) . . ? 
C92 O91 C94 102.9(14) . . ? 
O91 C92 C95 116.7(19) . . ? 
C95 C93 C94 115.1(19) . . ? 
O91 C94 C93 103.5(14) . . ? 
C93 C95 C92 95.9(18) . . ? 
  
_diffrn_measured_fraction_theta_max    0.996 
_diffrn_reflns_theta_full              23.32 
_diffrn_measured_fraction_theta_full   0.996 
_refine_diff_density_max    0.777 
_refine_diff_density_min   -0.475 
_refine_diff_density_rms    0.114 

#===END

data_Compound_4b_(ehf31am) 
  
_audit_creation_method            SHELXL-97 
_chemical_name_systematic 
; 
 ? 
; 
_chemical_name_common             ? 
_chemical_melting_point           ? 
_chemical_formula_moiety          ? 
_chemical_formula_sum 
 'C32 H34 N3 O8 Re' 
_chemical_formula_weight          774.82 
  
loop_ 
 _atom_type_symbol 
 _atom_type_description 
 _atom_type_scat_dispersion_real 
 _atom_type_scat_dispersion_imag 
 _atom_type_scat_source 
 'C'  'C'   0.0033   0.0016 
 'International Tables Vol C Tables 4.2.6.8 and 6.1.1.4' 
 'H'  'H'   0.0000   0.0000 
 'International Tables Vol C Tables 4.2.6.8 and 6.1.1.4' 
 'N'  'N'   0.0061   0.0033 
 'International Tables Vol C Tables 4.2.6.8 and 6.1.1.4' 
 'O'  'O'   0.0106   0.0060 
 'International Tables Vol C Tables 4.2.6.8 and 6.1.1.4' 
 'Re'  'Re'  -1.0185   7.2310 
 'International Tables Vol C Tables 4.2.6.8 and 6.1.1.4' 
  
_symmetry_cell_setting            Triclinic 
_symmetry_space_group_name_H-M    P-1 
  
loop_ 
 _symmetry_equiv_pos_as_xyz 
 'x, y, z' 
 '-x, -y, -z' 
  
_cell_length_a                    8.895(2) 
_cell_length_b                    13.262(3) 
_cell_length_c                    15.644(4) 
_cell_angle_alpha                 65.453(4) 
_cell_angle_beta                  81.655(4) 
_cell_angle_gamma                 80.031(4) 
_cell_volume                      1647.8(7) 
_cell_formula_units_Z             2 
_cell_measurement_temperature     293(2) 
_cell_measurement_reflns_used     ? 
_cell_measurement_theta_min       ? 
_cell_measurement_theta_max       ? 
  
_exptl_crystal_description        NEEDLE 
_exptl_crystal_colour             RED 
_exptl_crystal_size_max           0.04 
_exptl_crystal_size_mid           0.07 
_exptl_crystal_size_min           0.25 
_exptl_crystal_density_meas       ? 
_exptl_crystal_density_diffrn     1.562 
_exptl_crystal_density_method     'not measured' 
_exptl_crystal_F_000              772 
_exptl_absorpt_coefficient_mu     3.739 
_exptl_absorpt_correction_type    sadabs
_exptl_absorpt_correction_T_min   0.5377 
_exptl_absorpt_correction_T_max   1.0000
_exptl_absorpt_process_details    ? 
  
_exptl_special_details 
; 
 ? 
; 
  
_diffrn_ambient_temperature       293(2) 
_diffrn_radiation_wavelength      0.71073 
_diffrn_radiation_type            MoK\a 
_diffrn_radiation_source          'fine-focus sealed tube' 
_diffrn_radiation_monochromator   graphite 
_diffrn_measurement_device_type   'CCD area detector' 
_diffrn_measurement_method        'phi and omega scans' 
_diffrn_detector_area_resol_mean  ? 
_diffrn_standards_number          ? 
_diffrn_standards_interval_count  ? 
_diffrn_standards_interval_time   ? 
_diffrn_standards_decay_%         ? 
_diffrn_reflns_number             10588 
_diffrn_reflns_av_R_equivalents   0.0344 
_diffrn_reflns_av_sigmaI/netI     0.0441 
_diffrn_reflns_limit_h_min        -9 
_diffrn_reflns_limit_h_max        9 
_diffrn_reflns_limit_k_min        -14 
_diffrn_reflns_limit_k_max        14 
_diffrn_reflns_limit_l_min        -17 
_diffrn_reflns_limit_l_max        17 
_diffrn_reflns_theta_min          1.70 
_diffrn_reflns_theta_max          23.45 
_reflns_number_total              4774 
_reflns_number_gt                 4188 
_reflns_threshold_expression      >2sigma(I) 
  
_computing_data_collection        'Bruker SMART' 
_computing_cell_refinement        'Bruker SMART' 
_computing_data_reduction         'Bruker SHELXTL' 
_computing_structure_solution     'SHELXS-97 (Sheldrick, 1990)' 
_computing_structure_refinement   'SHELXL-97 (Sheldrick, 1997)' 
_computing_molecular_graphics     'Bruker SHELXTL' 
_computing_publication_material   'Bruker SHELXTL' 
  
_refine_special_details 
; 
 Refinement of F^2^ against ALL reflections.  The weighted R-factor wR and 
 goodness of fit S are based on F^2^, conventional R-factors R are based 
 on F, with F set to zero for negative F^2^. The threshold expression of 
 F^2^ > 2sigma(F^2^) is used only for calculating R-factors(gt) etc. and is 
 not relevant to the choice of reflections for refinement.  R-factors based 
 on F^2^ are statistically about twice as large as those based on F, and R- 
 factors based on ALL data will be even larger. 
; 
  
_refine_ls_structure_factor_coef  Fsqd 
_refine_ls_matrix_type            full 
_refine_ls_weighting_scheme       calc 
_refine_ls_weighting_details 
 'calc w=1/[\s^2^(Fo^2^)+(0.0320P)^2^+0.0000P] where P=(Fo^2^+2Fc^2^)/3' 
_atom_sites_solution_primary      direct 
_atom_sites_solution_secondary    difmap 
_atom_sites_solution_hydrogens    geom 
_refine_ls_hydrogen_treatment     mixed 
_refine_ls_extinction_method      none 
_refine_ls_extinction_coef        ? 
_refine_ls_number_reflns          4774 
_refine_ls_number_parameters      379 
_refine_ls_number_restraints      0 
_refine_ls_R_factor_all           0.0341 
_refine_ls_R_factor_gt            0.0282 
_refine_ls_wR_factor_ref          0.0652 
_refine_ls_wR_factor_gt           0.0637 
_refine_ls_goodness_of_fit_ref    1.020 
_refine_ls_restrained_S_all       1.020 
_refine_ls_shift/su_max           0.004 
_refine_ls_shift/su_mean          0.000 
  
loop_ 
 _atom_site_label 
 _atom_site_type_symbol 
 _atom_site_fract_x 
 _atom_site_fract_y 
 _atom_site_fract_z 
 _atom_site_U_iso_or_equiv 
 _atom_site_adp_type 
 _atom_site_occupancy 
 _atom_site_symmetry_multiplicity 
 _atom_site_calc_flag 
 _atom_site_refinement_flags 
 _atom_site_disorder_assembly 
 _atom_site_disorder_group 
Re1 Re 0.76199(2) 0.561820(18) 0.705636(14) 0.04105(9) Uani 1 1 d . . . 
N1 N 0.9817(5) 0.5617(3) 0.6205(3) 0.0457(10) Uani 1 1 d . . . 
N2 N 0.9353(4) 0.4730(3) 0.8054(3) 0.0437(10) Uani 1 1 d . . . 
C1 C 0.6915(6) 0.4319(5) 0.7164(4) 0.0544(14) Uani 1 1 d . . . 
O1 O 0.6327(5) 0.3537(4) 0.7273(3) 0.0783(13) Uani 1 1 d . . . 
C2 C 0.6394(6) 0.6402(5) 0.6025(4) 0.0572(15) Uani 1 1 d . . . 
O2 O 0.5721(5) 0.6834(4) 0.5349(3) 0.0950(16) Uani 1 1 d . . . 
C3 C 0.5888(5) 0.5839(4) 0.7980(3) 0.0460(13) Uani 1 1 d . . . 
O3 O 0.4717(4) 0.5211(3) 0.8336(3) 0.0610(10) Uani 1 1 d G . . 
H3 H 0.4179 0.5469 0.8771 0.10(2) Uiso 1 1 d G . . 
N3 N 0.8096(4) 0.7064(3) 0.7261(3) 0.0434(10) Uani 1 1 d . . . 
O13 O 0.8121(5) 0.8301(3) 0.8637(3) 0.0666(11) Uani 1 1 d . . . 
O14 O 0.6569(5) 0.9252(3) 0.7466(3) 0.0654(11) Uani 1 1 d . . . 
O16 O 0.3646(4) 0.6334(3) 0.9331(3) 0.0678(11) Uani 1 1 d . . . 
O17 O 0.4965(4) 0.7646(3) 0.9291(3) 0.0659(11) Uani 1 1 d . . . 
C11 C 0.7142(5) 0.7339(4) 0.7867(3) 0.0412(12) Uani 1 1 d . . . 
C12 C 0.5880(5) 0.6704(4) 0.8296(3) 0.0435(12) Uani 1 1 d . . . 
C13 C 0.7343(6) 0.8334(5) 0.8058(4) 0.0509(14) Uani 1 1 d . . . 
C14 C 0.6606(10) 1.0290(6) 0.7573(6) 0.098(2) Uani 1 1 d . . . 
H14A H 0.6052 1.0254 0.8165 0.118 Uiso 1 1 calc R . . 
H14B H 0.7658 1.0383 0.7589 0.118 Uiso 1 1 calc R . . 
C15 C 0.5936(14) 1.1219(7) 0.6816(7) 0.159(4) Uani 1 1 d . . . 
H15A H 0.6460 1.1238 0.6229 0.238 Uiso 1 1 calc R . . 
H15B H 0.6019 1.1896 0.6881 0.238 Uiso 1 1 calc R . . 
H15C H 0.4876 1.1151 0.6826 0.238 Uiso 1 1 calc R . . 
C16 C 0.4743(6) 0.6874(5) 0.8996(4) 0.0527(14) Uani 1 1 d . . . 
C17 C 0.3908(8) 0.7752(6) 1.0069(5) 0.085(2) Uani 1 1 d . . . 
H17A H 0.2871 0.7979 0.9878 0.102 Uiso 1 1 calc R . . 
H17B H 0.3935 0.7040 1.0608 0.102 Uiso 1 1 calc R . . 
C18 C 0.4381(9) 0.8584(7) 1.0314(6) 0.111(3) Uani 1 1 d . . . 
H18A H 0.5403 0.8347 1.0511 0.167 Uiso 1 1 calc R . . 
H18B H 0.3696 0.8673 1.0819 0.167 Uiso 1 1 calc R . . 
H18C H 0.4357 0.9284 0.9775 0.167 Uiso 1 1 calc R . . 
C21 C 0.9969(6) 0.6128(5) 0.5250(4) 0.0532(14) Uani 1 1 d . . . 
H21 H 0.9092 0.6427 0.4925 0.064 Uiso 1 1 calc R . . 
C22 C 1.1375(7) 0.6217(5) 0.4750(4) 0.0635(16) Uani 1 1 d . . . 
H22 H 1.1447 0.6576 0.4096 0.076 Uiso 1 1 calc R . . 
C23 C 1.2673(7) 0.5774(6) 0.5223(5) 0.0731(19) Uani 1 1 d . . . 
H23 H 1.3633 0.5826 0.4892 0.088 Uiso 1 1 calc R . . 
C24 C 1.2544(6) 0.5254(5) 0.6185(4) 0.0706(18) Uani 1 1 d . . . 
H24 H 1.3420 0.4958 0.6512 0.085 Uiso 1 1 calc R . . 
C25 C 1.1101(6) 0.5167(4) 0.6676(4) 0.0462(13) Uani 1 1 d . . . 
C26 C 1.0840(6) 0.4644(4) 0.7708(4) 0.0476(13) Uani 1 1 d . . . 
C27 C 1.1993(6) 0.4090(5) 0.8307(4) 0.0623(16) Uani 1 1 d . . . 
H27 H 1.3005 0.4039 0.8059 0.075 Uiso 1 1 calc R . . 
C28 C 1.1656(7) 0.3624(6) 0.9249(5) 0.0762(19) Uani 1 1 d . . . 
H28 H 1.2429 0.3250 0.9652 0.091 Uiso 1 1 calc R . . 
C29 C 1.0157(7) 0.3709(6) 0.9602(4) 0.0749(19) Uani 1 1 d . . . 
H29 H 0.9902 0.3388 1.0249 0.090 Uiso 1 1 calc R . . 
C30 C 0.9044(7) 0.4268(5) 0.8996(4) 0.0581(15) Uani 1 1 d . . . 
H30 H 0.8034 0.4334 0.9244 0.070 Uiso 1 1 calc R . . 
C41 C 0.9469(5) 0.7591(4) 0.6872(3) 0.0418(12) Uani 1 1 d . . . 
C42 C 1.0659(6) 0.7374(5) 0.7430(4) 0.0577(15) Uani 1 1 d . . . 
H42 H 1.0568 0.6901 0.8066 0.069 Uiso 1 1 calc R . . 
C43 C 1.1983(6) 0.7865(6) 0.7034(5) 0.0733(18) Uani 1 1 d . . . 
H43 H 1.2768 0.7723 0.7418 0.088 Uiso 1 1 calc R . . 
C44 C 1.2182(7) 0.8546(5) 0.6109(6) 0.0709(18) Uani 1 1 d . . . 
C45 C 1.1008(7) 0.8730(5) 0.5558(4) 0.0697(17) Uani 1 1 d . . . 
H45 H 1.1119 0.9187 0.4920 0.084 Uiso 1 1 calc R . . 
C46 C 0.9665(6) 0.8252(5) 0.5928(4) 0.0571(15) Uani 1 1 d . . . 
H46 H 0.8897 0.8379 0.5537 0.069 Uiso 1 1 calc R . . 
C47 C 1.3644(8) 0.9117(7) 0.5690(6) 0.106(3) Uani 1 1 d . . . 
H47A H 1.3666 0.9442 0.5015 0.159 Uiso 1 1 calc R . . 
H47B H 1.4528 0.8573 0.5883 0.159 Uiso 1 1 calc R . . 
H47C H 1.3648 0.9691 0.5912 0.159 Uiso 1 1 calc R . . 
O91 O 0.152(2) 0.0090(17) 0.7997(17) 0.394(9) Uiso 1 1 d . . . 
C91 C 0.109(3) 0.065(3) 0.867(2) 0.387(15) Uiso 1 1 d . . . 
H91A H 0.0507 0.0197 0.9234 0.465 Uiso 1 1 calc R . . 
H91B H 0.1996 0.0805 0.8856 0.465 Uiso 1 1 calc R . . 
C92 C 0.027(3) 0.157(2) 0.818(2) 0.340(13) Uiso 1 1 d . . . 
H92A H -0.0793 0.1437 0.8258 0.409 Uiso 1 1 calc R . . 
H92B H 0.0314 0.2138 0.8409 0.409 Uiso 1 1 calc R . . 
C93 C 0.072(3) 0.194(2) 0.7293(18) 0.314(11) Uiso 1 1 d . . . 
H93A H 0.1642 0.2289 0.7177 0.376 Uiso 1 1 calc R . . 
H93B H -0.0064 0.2486 0.6925 0.376 Uiso 1 1 calc R . . 
C94 C 0.101(2) 0.104(2) 0.7044(16) 0.301(10) Uiso 1 1 d . . . 
H94A H 0.1822 0.1141 0.6540 0.362 Uiso 1 1 calc R . . 
H94B H 0.0100 0.0903 0.6856 0.362 Uiso 1 1 calc R . . 
  
loop_ 
 _atom_site_aniso_label 
 _atom_site_aniso_U_11 
 _atom_site_aniso_U_22 
 _atom_site_aniso_U_33 
 _atom_site_aniso_U_23 
 _atom_site_aniso_U_13 
 _atom_site_aniso_U_12 
Re1 0.03606(12) 0.04929(14) 0.04340(13) -0.02445(10) 0.00783(8) -0.01366(9) 
N1 0.049(3) 0.051(3) 0.042(3) -0.023(2) 0.011(2) -0.017(2) 
N2 0.043(2) 0.046(3) 0.045(3) -0.022(2) 0.0055(19) -0.013(2) 
C1 0.046(3) 0.069(4) 0.054(3) -0.033(3) 0.011(3) -0.017(3) 
O1 0.085(3) 0.081(3) 0.093(3) -0.056(3) 0.023(2) -0.043(3) 
C2 0.042(3) 0.069(4) 0.067(4) -0.034(3) 0.006(3) -0.013(3) 
O2 0.089(3) 0.116(4) 0.078(3) -0.033(3) -0.036(3) -0.002(3) 
C3 0.038(3) 0.055(3) 0.047(3) -0.020(3) 0.003(2) -0.017(2) 
O3 0.047(2) 0.073(3) 0.079(3) -0.047(2) 0.027(2) -0.033(2) 
N3 0.038(2) 0.049(3) 0.046(2) -0.023(2) 0.0053(19) -0.0115(19) 
O13 0.071(3) 0.075(3) 0.067(3) -0.038(2) -0.012(2) -0.012(2) 
O14 0.085(3) 0.047(2) 0.072(3) -0.030(2) -0.021(2) -0.003(2) 
O16 0.056(2) 0.086(3) 0.077(3) -0.051(2) 0.028(2) -0.030(2) 
O17 0.064(2) 0.081(3) 0.073(3) -0.054(2) 0.024(2) -0.025(2) 
C11 0.044(3) 0.046(3) 0.041(3) -0.024(3) 0.001(2) -0.009(2) 
C12 0.038(3) 0.050(3) 0.050(3) -0.028(3) 0.011(2) -0.013(2) 
C13 0.051(3) 0.058(4) 0.048(3) -0.026(3) 0.010(3) -0.017(3) 
C14 0.148(7) 0.051(4) 0.108(6) -0.041(4) -0.028(5) -0.006(4) 
C15 0.258(13) 0.061(6) 0.162(10) -0.044(6) -0.061(9) 0.001(7) 
C16 0.047(3) 0.063(4) 0.053(3) -0.031(3) 0.006(3) -0.010(3) 
C17 0.088(5) 0.097(5) 0.089(5) -0.065(5) 0.042(4) -0.027(4) 
C18 0.134(7) 0.115(7) 0.121(7) -0.090(6) 0.036(5) -0.034(5) 
C21 0.063(4) 0.058(4) 0.043(3) -0.026(3) 0.008(3) -0.014(3) 
C22 0.069(4) 0.073(4) 0.051(3) -0.031(3) 0.026(3) -0.027(3) 
C23 0.055(4) 0.096(5) 0.073(5) -0.045(4) 0.034(3) -0.029(4) 
C24 0.042(3) 0.089(5) 0.074(4) -0.031(4) 0.017(3) -0.014(3) 
C25 0.041(3) 0.053(3) 0.050(3) -0.026(3) 0.007(2) -0.013(2) 
C26 0.040(3) 0.052(3) 0.056(3) -0.027(3) 0.002(3) -0.014(3) 
C27 0.041(3) 0.077(4) 0.067(4) -0.026(4) -0.002(3) -0.015(3) 
C28 0.058(4) 0.096(5) 0.063(4) -0.016(4) -0.021(3) -0.008(4) 
C29 0.076(5) 0.092(5) 0.047(4) -0.015(4) -0.007(3) -0.016(4) 
C30 0.058(4) 0.073(4) 0.043(3) -0.020(3) 0.006(3) -0.021(3) 
C41 0.044(3) 0.040(3) 0.048(3) -0.024(3) 0.009(2) -0.014(2) 
C42 0.055(3) 0.069(4) 0.052(3) -0.024(3) 0.001(3) -0.019(3) 
C43 0.050(4) 0.086(5) 0.098(5) -0.045(4) -0.004(3) -0.026(3) 
C44 0.051(4) 0.061(4) 0.107(6) -0.042(4) 0.023(4) -0.026(3) 
C45 0.071(4) 0.062(4) 0.063(4) -0.014(3) 0.021(3) -0.024(3) 
C46 0.051(3) 0.055(4) 0.055(4) -0.010(3) 0.000(3) -0.014(3) 
C47 0.070(5) 0.107(6) 0.155(8) -0.066(6) 0.042(5) -0.051(4) 
  
_geom_special_details 
; 
 All esds (except the esd in the dihedral angle between two l.s. planes) 
 are estimated using the full covariance matrix.  The cell esds are taken 
 into account individually in the estimation of esds in distances, angles 
 and torsion angles; correlations between esds in cell parameters are only 
 used when they are defined by crystal symmetry.  An approximate (isotropic) 
 treatment of cell esds is used for estimating esds involving l.s. planes. 
; 
  
loop_ 
 _geom_bond_atom_site_label_1 
 _geom_bond_atom_site_label_2 
 _geom_bond_distance 
 _geom_bond_site_symmetry_2 
 _geom_bond_publ_flag 
Re1 C1 1.869(6) . ? 
Re1 C2 1.897(6) . ? 
Re1 C3 2.024(5) . ? 
Re1 N2 2.177(4) . ? 
Re1 N3 2.189(4) . ? 
Re1 N1 2.200(4) . ? 
N1 C21 1.356(6) . ? 
N1 C25 1.359(6) . ? 
N2 C30 1.347(6) . ? 
N2 C26 1.358(6) . ? 
C1 O1 1.180(6) . ? 
C2 O2 1.169(7) . ? 
C3 O3 1.354(6) . ? 
C3 C12 1.425(7) . ? 
N3 C11 1.304(6) . ? 
N3 C41 1.440(6) . ? 
O13 C13 1.199(6) . ? 
O14 C13 1.332(7) . ? 
O14 C14 1.460(7) . ? 
O16 C16 1.234(6) . ? 
O17 C16 1.337(6) . ? 
O17 C17 1.465(6) . ? 
C11 C12 1.435(6) . ? 
C11 C13 1.513(7) . ? 
C12 C16 1.441(7) . ? 
C14 C15 1.419(10) . ? 
C17 C18 1.450(9) . ? 
C21 C22 1.371(7) . ? 
C22 C23 1.370(8) . ? 
C23 C24 1.368(8) . ? 
C24 C25 1.393(7) . ? 
C25 C26 1.469(7) . ? 
C26 C27 1.384(7) . ? 
C27 C28 1.350(8) . ? 
C28 C29 1.372(8) . ? 
C29 C30 1.365(8) . ? 
C41 C46 1.372(7) . ? 
C41 C42 1.385(7) . ? 
C42 C43 1.384(7) . ? 
C43 C44 1.355(8) . ? 
C44 C45 1.375(9) . ? 
C44 C47 1.540(8) . ? 
C45 C46 1.386(7) . ? 
O91 C91 1.50(3) . ? 
O91 C94 1.57(2) . ? 
C91 C92 1.31(3) . ? 
C92 C93 1.29(3) . ? 
C93 C94 1.37(3) . ? 
  
loop_ 
 _geom_angle_atom_site_label_1 
 _geom_angle_atom_site_label_2 
 _geom_angle_atom_site_label_3 
 _geom_angle 
 _geom_angle_site_symmetry_1 
 _geom_angle_site_symmetry_3 
 _geom_angle_publ_flag 
C1 Re1 C2 87.0(2) . . ? 
C1 Re1 C3 90.8(2) . . ? 
C2 Re1 C3 91.8(2) . . ? 
C1 Re1 N2 94.4(2) . . ? 
C2 Re1 N2 170.03(18) . . ? 
C3 Re1 N2 98.04(17) . . ? 
C1 Re1 N3 165.75(18) . . ? 
C2 Re1 N3 97.9(2) . . ? 
C3 Re1 N3 75.78(17) . . ? 
N2 Re1 N3 83.11(15) . . ? 
C1 Re1 N1 102.75(19) . . ? 
C2 Re1 N1 96.21(19) . . ? 
C3 Re1 N1 164.59(17) . . ? 
N2 Re1 N1 73.85(15) . . ? 
N3 Re1 N1 90.06(14) . . ? 
C21 N1 C25 118.8(4) . . ? 
C21 N1 Re1 123.7(4) . . ? 
C25 N1 Re1 117.2(3) . . ? 
C30 N2 C26 117.8(4) . . ? 
C30 N2 Re1 124.0(3) . . ? 
C26 N2 Re1 118.2(3) . . ? 
O1 C1 Re1 172.9(5) . . ? 
O2 C2 Re1 174.2(5) . . ? 
O3 C3 C12 116.5(4) . . ? 
O3 C3 Re1 124.7(4) . . ? 
C12 C3 Re1 118.9(3) . . ? 
C11 N3 C41 120.7(4) . . ? 
C11 N3 Re1 115.1(3) . . ? 
C41 N3 Re1 123.6(3) . . ? 
C13 O14 C14 116.7(5) . . ? 
C16 O17 C17 116.5(4) . . ? 
N3 C11 C12 117.6(4) . . ? 
N3 C11 C13 119.9(4) . . ? 
C12 C11 C13 122.4(4) . . ? 
C3 C12 C11 112.5(4) . . ? 
C3 C12 C16 122.4(4) . . ? 
C11 C12 C16 125.0(5) . . ? 
O13 C13 O14 125.5(5) . . ? 
O13 C13 C11 124.8(5) . . ? 
O14 C13 C11 109.6(5) . . ? 
C15 C14 O14 110.6(6) . . ? 
O16 C16 O17 120.9(5) . . ? 
O16 C16 C12 123.4(5) . . ? 
O17 C16 C12 115.8(5) . . ? 
C18 C17 O17 108.1(5) . . ? 
N1 C21 C22 122.0(5) . . ? 
C23 C22 C21 119.4(6) . . ? 
C24 C23 C22 119.4(5) . . ? 
C23 C24 C25 120.0(6) . . ? 
N1 C25 C24 120.3(5) . . ? 
N1 C25 C26 115.4(4) . . ? 
C24 C25 C26 124.2(5) . . ? 
N2 C26 C27 120.9(5) . . ? 
N2 C26 C25 115.1(4) . . ? 
C27 C26 C25 123.9(5) . . ? 
C28 C27 C26 120.3(5) . . ? 
C27 C28 C29 119.1(5) . . ? 
C30 C29 C28 119.4(6) . . ? 
N2 C30 C29 122.5(5) . . ? 
C46 C41 C42 118.8(5) . . ? 
C46 C41 N3 120.5(4) . . ? 
C42 C41 N3 120.6(4) . . ? 
C43 C42 C41 119.5(5) . . ? 
C44 C43 C42 122.6(6) . . ? 
C43 C44 C45 117.3(5) . . ? 
C43 C44 C47 121.7(7) . . ? 
C45 C44 C47 121.0(7) . . ? 
C44 C45 C46 121.9(6) . . ? 
C41 C46 C45 119.9(5) . . ? 
C91 O91 C94 102.4(19) . . ? 
C92 C91 O91 102(2) . . ? 
C93 C92 C91 112(3) . . ? 
C92 C93 C94 108(2) . . ? 
C93 C94 O91 100.3(19) . . ? 
  
_diffrn_measured_fraction_theta_max    0.985 
_diffrn_reflns_theta_full              23.45 
_diffrn_measured_fraction_theta_full   0.985 
_refine_diff_density_max    0.791 
_refine_diff_density_min   -0.898 
_refine_diff_density_rms    0.083 
  
#===END
